# Supplementary material
Source: MDPI journal article supplement (https://www.mdpi.com/2077-0472/11/7/625)

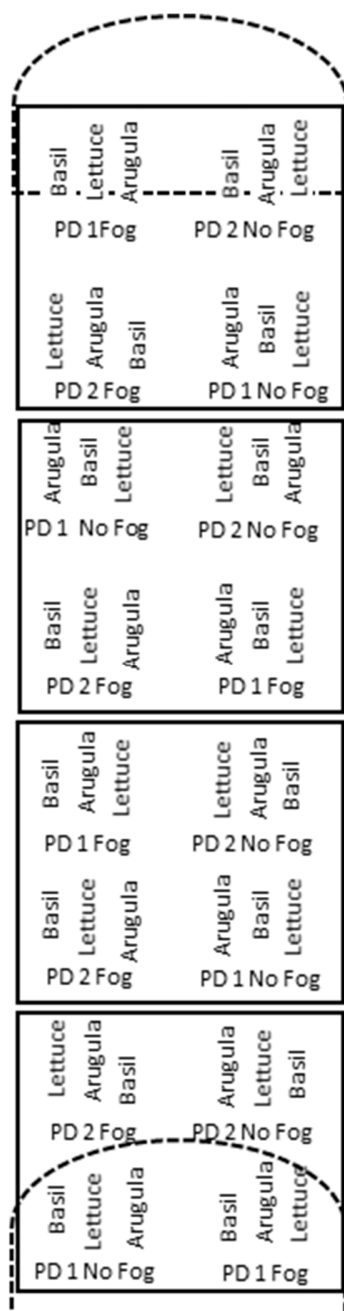

**Figure S1.** Experimental Design Layout.

Supplement: s1 [file s1 › agriculture-1254606-supplementary.pdf]
